# Supplementary material
Source: PubMed Central journal article supplement (PMC7873343)

Supplemental Figures for:  
Changes in Stage Distribution and Disease Specific Survival in Differentiated Thyroid Cancer with Transition to AJCC 8th edition: A Meta-Analysis  
Melissa Lechner et al.

Figure S1. Funnel plots did not show evidence of publication bias for mortality estimation (Hazard Ratio, HR) or stage migration.

Funnel plot for Hazard Ratio (HR) by edition, 1=AJCC-7, 2=AJCC-8.

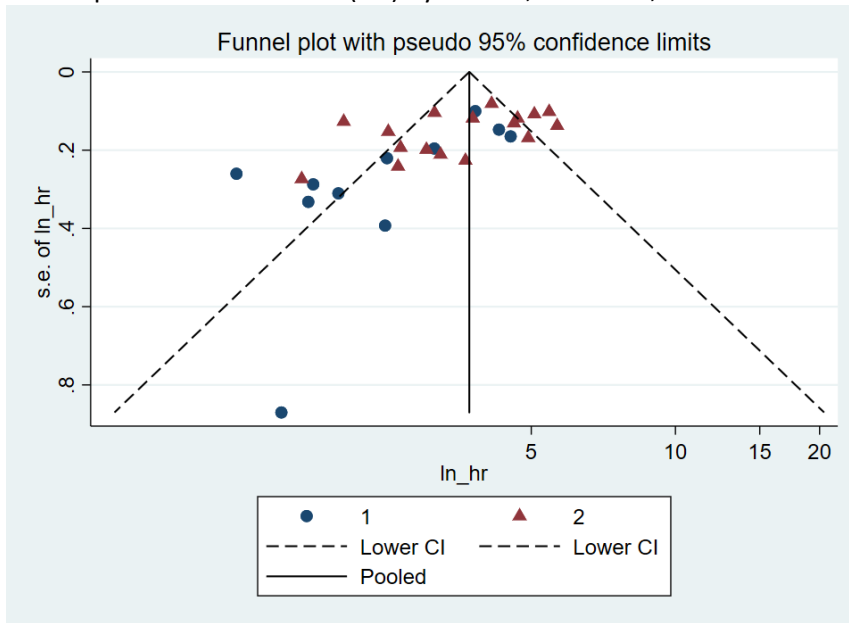

Funnel plot for HR AJCC-7.

Supplemental Figures for:  
 Changes in Stage Distribution and Disease Specific Survival in Differentiated Thyroid Cancer with Transition to  
 AJCC 8th edition: A Meta-Analysis  
 Melissa Lechner et al.

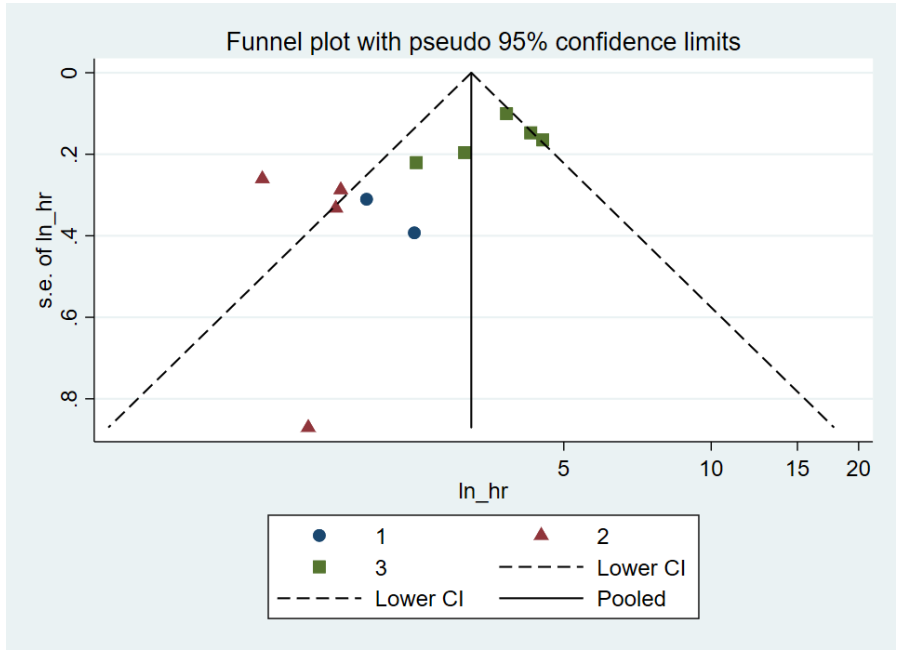

Funnel plot for HR AJCC-8.

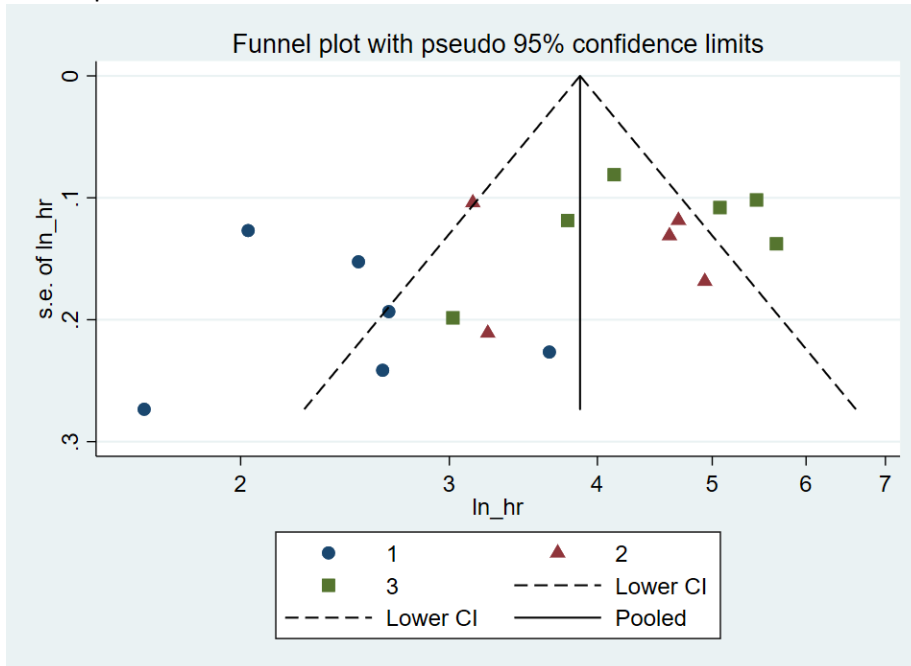

Stage migration from Stage II to I.

Supplemental Figures for:  
 Changes in Stage Distribution and Disease Specific Survival in Differentiated Thyroid Cancer with Transition to  
 AJCC 8th edition: A Meta-Analysis  
 Melissa Lechner et al.

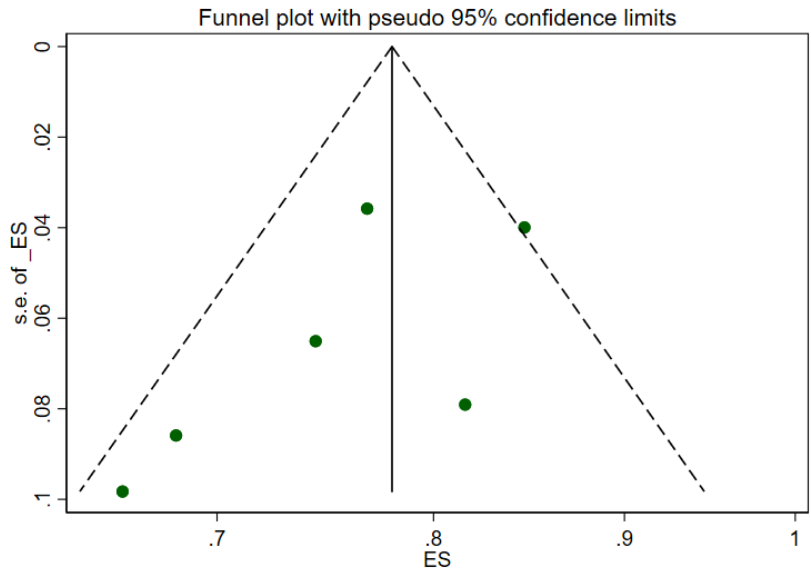

Stage migration, Remained in Stage II.

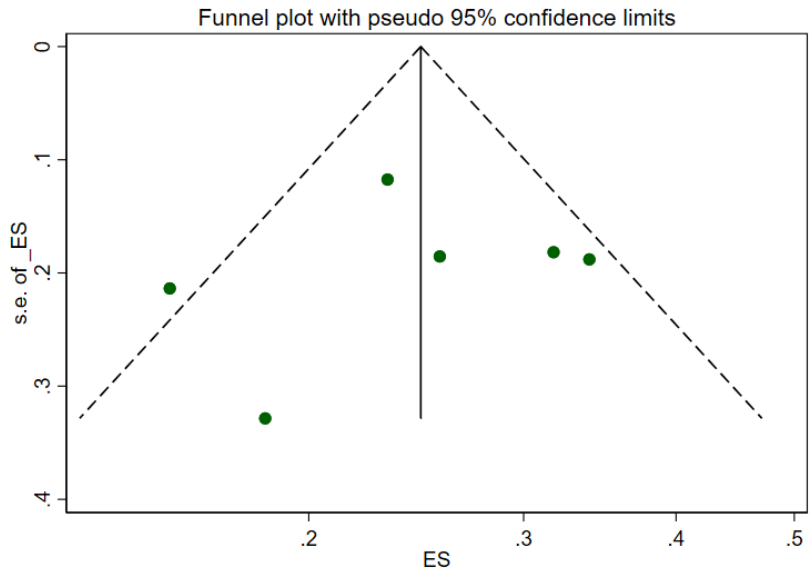

Stage migration from Stage III to I.

Supplemental Figures for:  
Changes in Stage Distribution and Disease Specific Survival in Differentiated Thyroid Cancer with Transition to  
AJCC 8th edition: A Meta-Analysis  
Melissa Lechner et al.

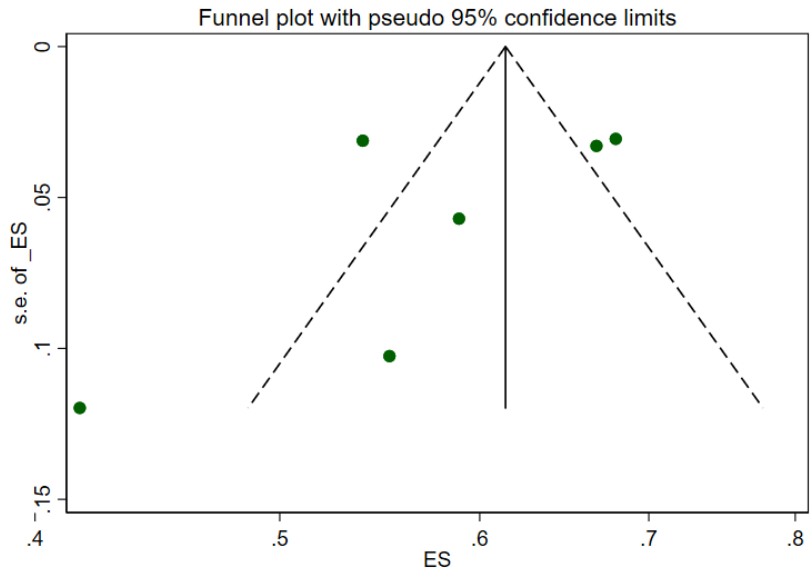

Stage migration from Stage III to II.

Supplemental Figures for:  
Changes in Stage Distribution and Disease Specific Survival in Differentiated Thyroid Cancer with Transition to  
AJCC 8th edition: A Meta-Analysis  
Melissa Lechner et al.

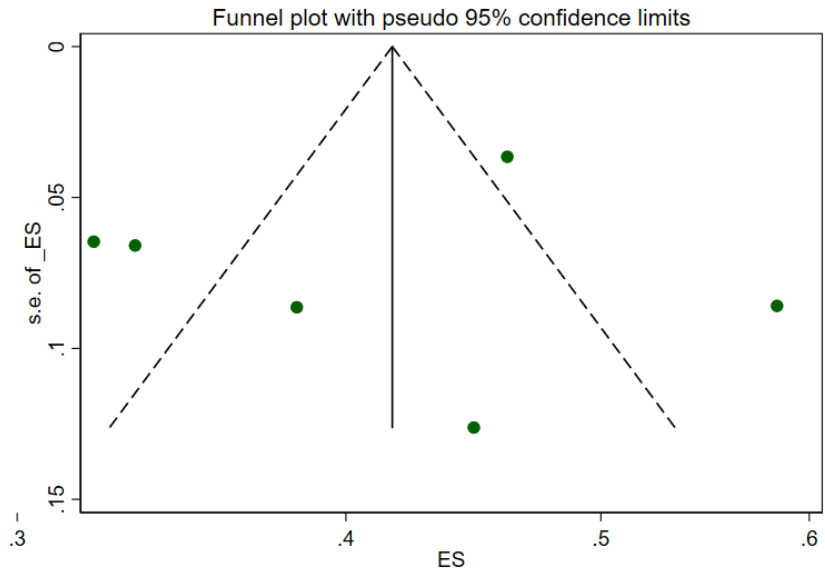

Stage migration from Stage IV to I.

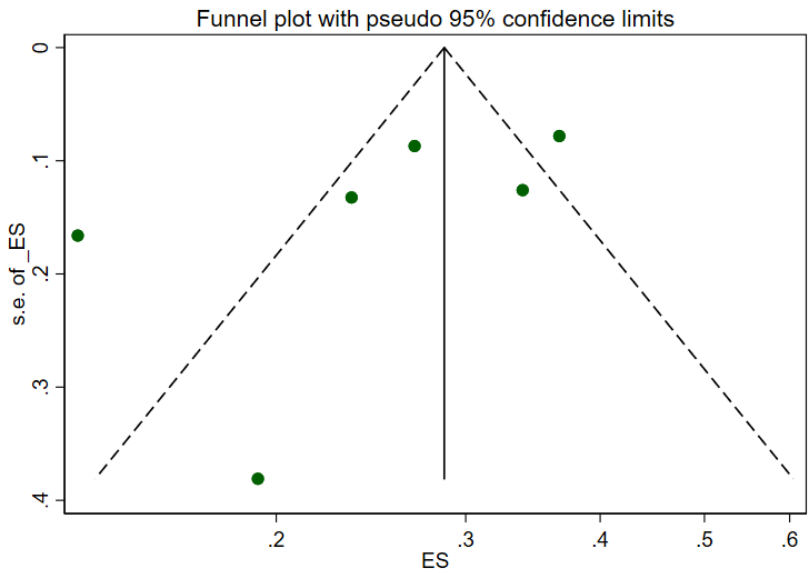

Supplemental Figures for:  
Changes in Stage Distribution and Disease Specific Survival in Differentiated Thyroid Cancer with Transition to AJCC 8th edition: A Meta-Analysis  
Melissa Lechner et al.

Stage migration from Stage IV to II.

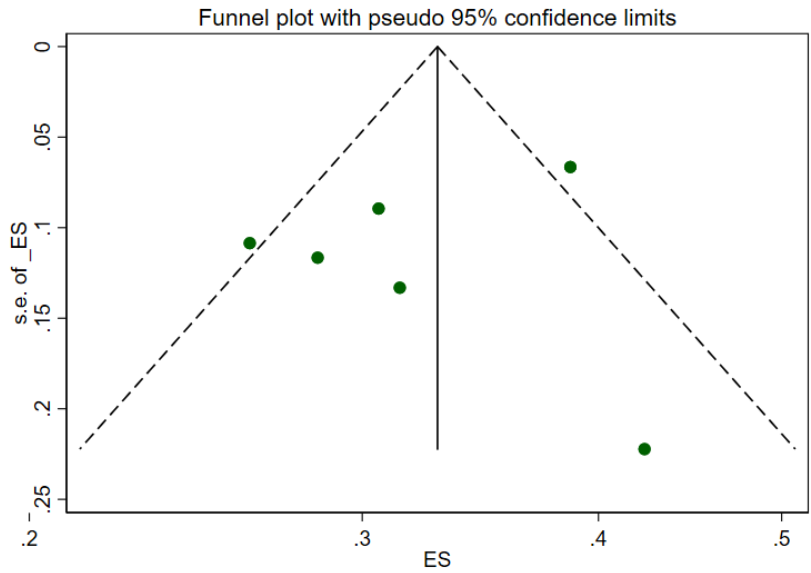

1

Stage migration from Stage IV to III.

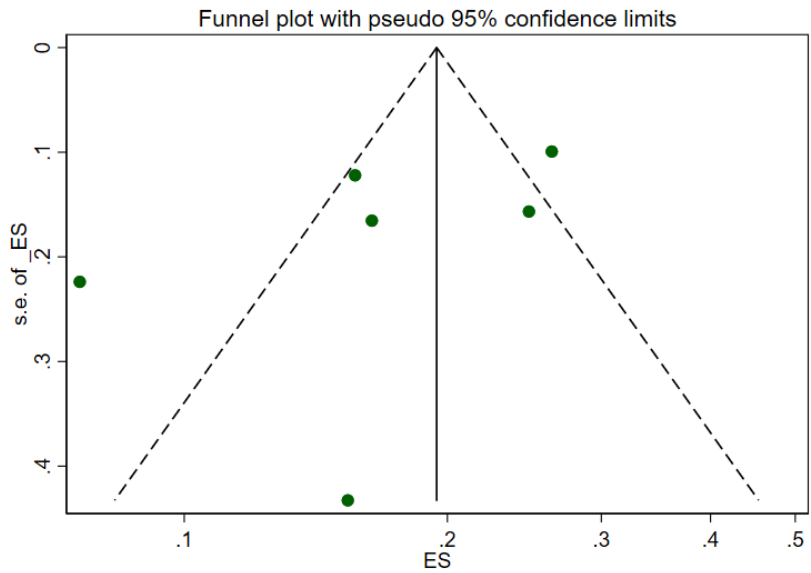

Supplemental Figures for:  
Changes in Stage Distribution and Disease Specific Survival in Differentiated Thyroid Cancer with Transition to  
AJCC 8th edition: A Meta-Analysis  
Melissa Lechner et al.

Stage migration, remained in Stage IV.

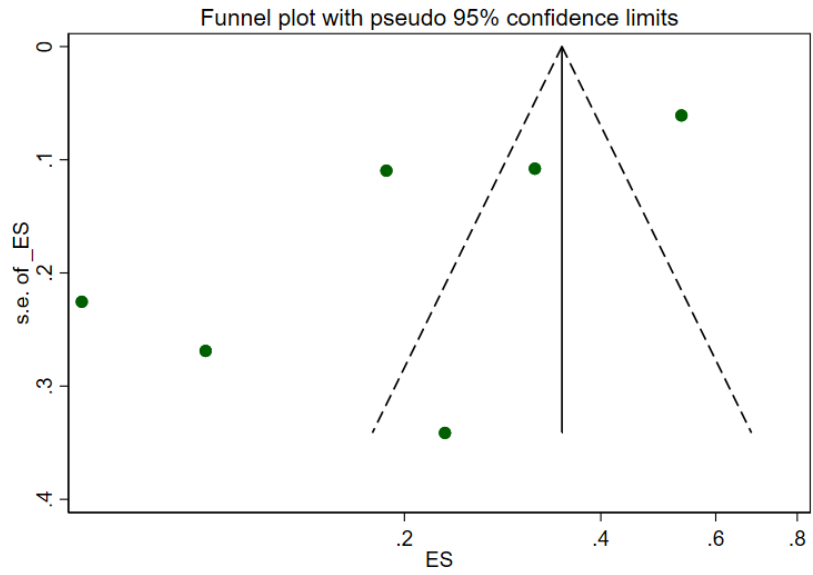

Supplemental Figures for:  
 Changes in Stage Distribution and Disease Specific Survival in Differentiated Thyroid Cancer with Transition to  
 AJCC 8th edition: A Meta-Analysis  
 Melissa Lechner et al.

Figure S2. Sensitivity analysis for disease specific mortality Hazard Ratio (HR) and stage migration indicates that the removal of studies one-by-one does not significantly change summary estimates.  
 Sensitivity analysis for HR AJCC-7, Stage II.

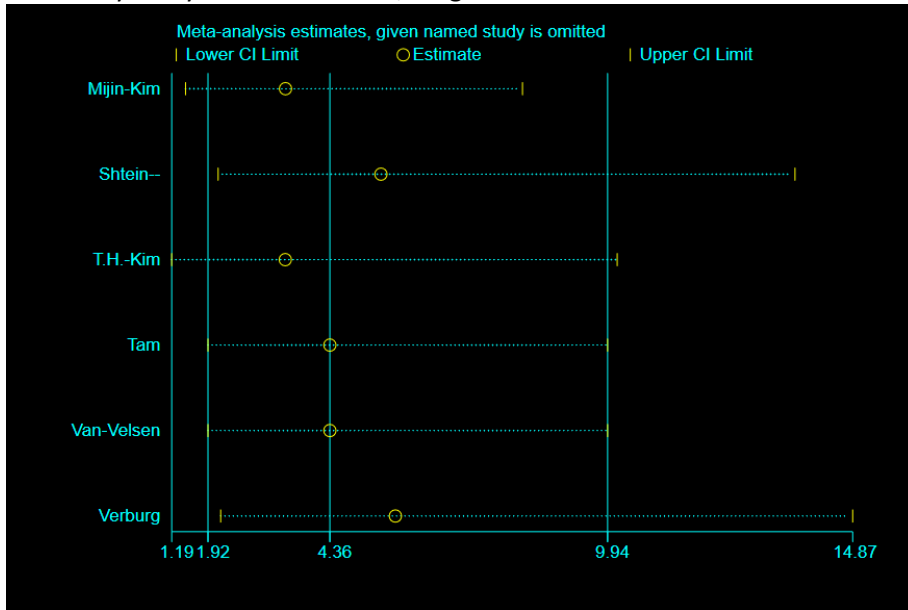

Sensitivity analysis for HR, AJCC-7 Stage III.

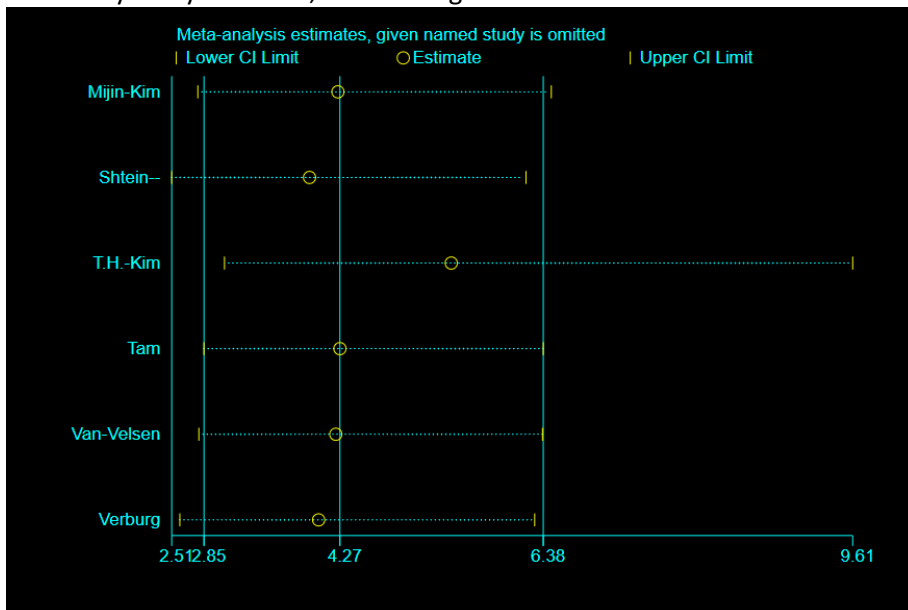



Supplemental Figures for:  
 Changes in Stage Distribution and Disease Specific Survival in Differentiated Thyroid Cancer with Transition to  
 AJCC 8th edition: A Meta-Analysis  
 Melissa Lechner et al.

Sensitivity analysis for HR, AJCC-8, Stage II.

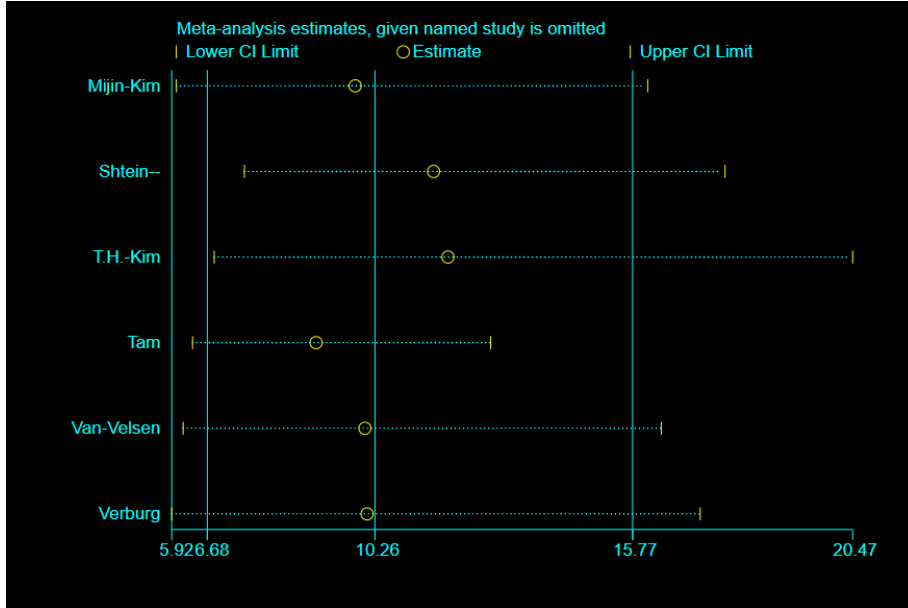

Sensitivity analysis for HR, AJCC-8, Stage III.

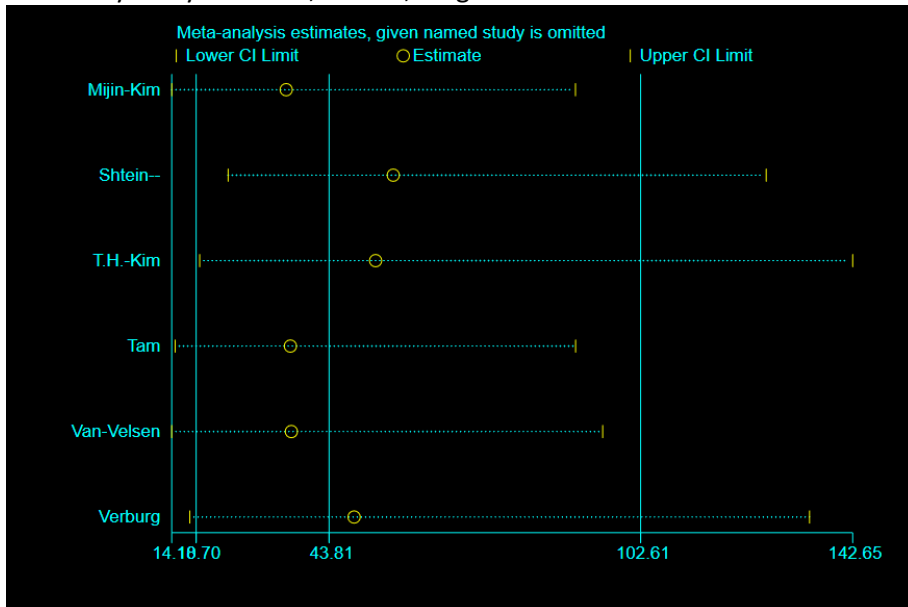

Supplemental Figures for:  
 Changes in Stage Distribution and Disease Specific Survival in Differentiated Thyroid Cancer with Transition to  
 AJCC 8th edition: A Meta-Analysis  
 Melissa Lechner et al.

Sensitivity analysis for HR, AJCC-7, Stage IV.

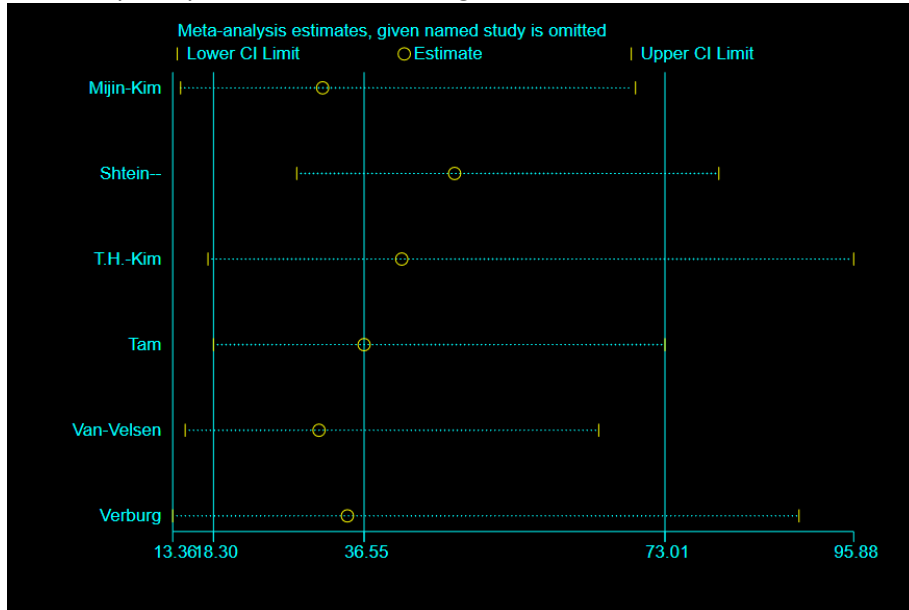

Sensitivity analysis for HR, AJCC-8, Stage IV.

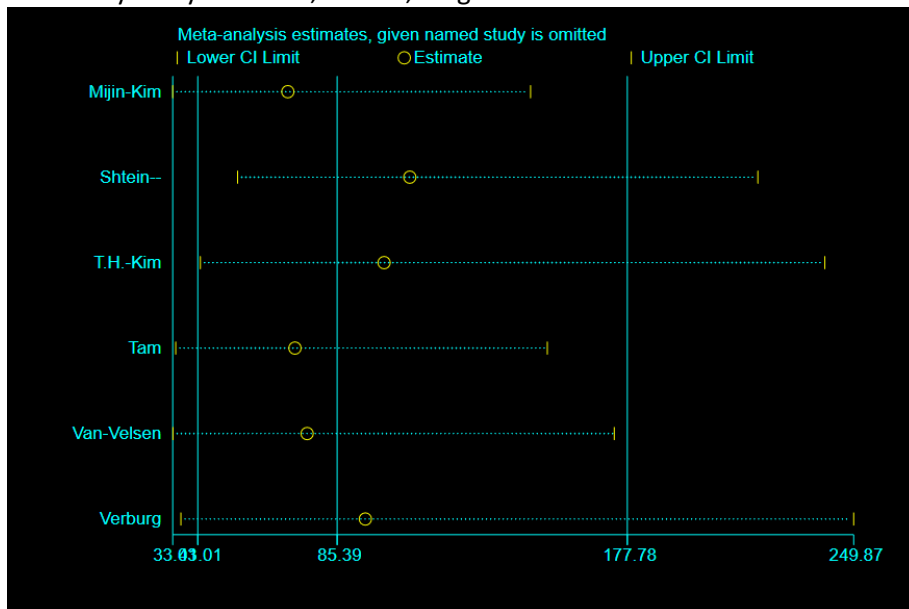

Supplemental Figures for:  
 Changes in Stage Distribution and Disease Specific Survival in Differentiated Thyroid Cancer with Transition to  
 AJCC 8th edition: A Meta-Analysis  
 Melissa Lechner et al.

Sensitivity analysis for DSS, AJCC-7, Stage I.

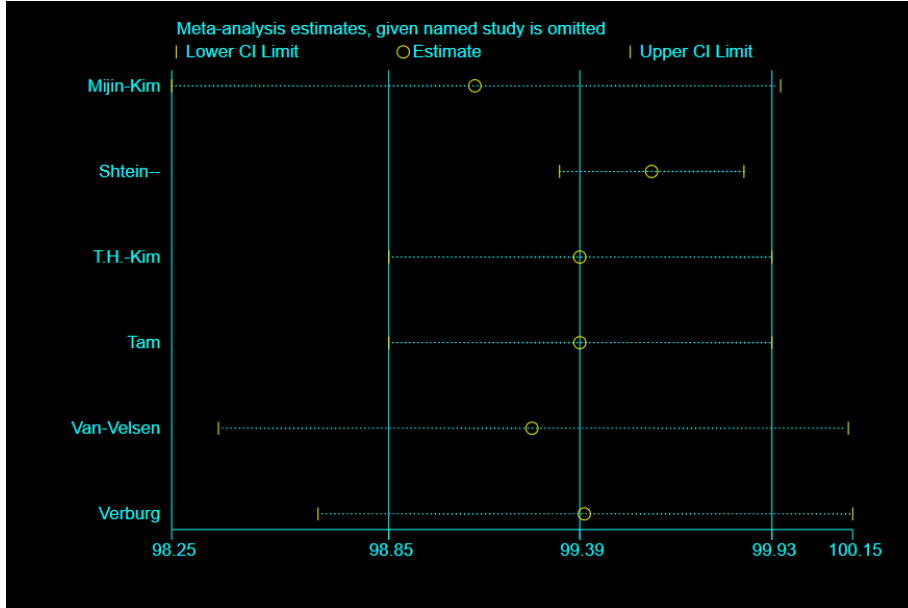

Sensitivity analysis for DSS, AJCC-7, Stage II.

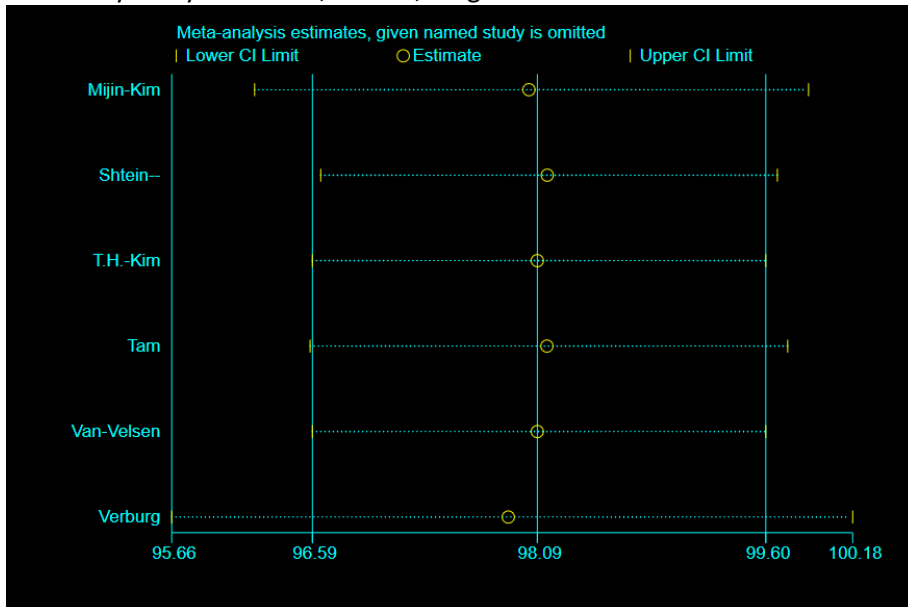

Supplemental Figures for:  
 Changes in Stage Distribution and Disease Specific Survival in Differentiated Thyroid Cancer with Transition to  
 AJCC 8th edition: A Meta-Analysis  
 Melissa Lechner et al.

Sensitivity analysis for DSS, AJCC-8, Stage I.

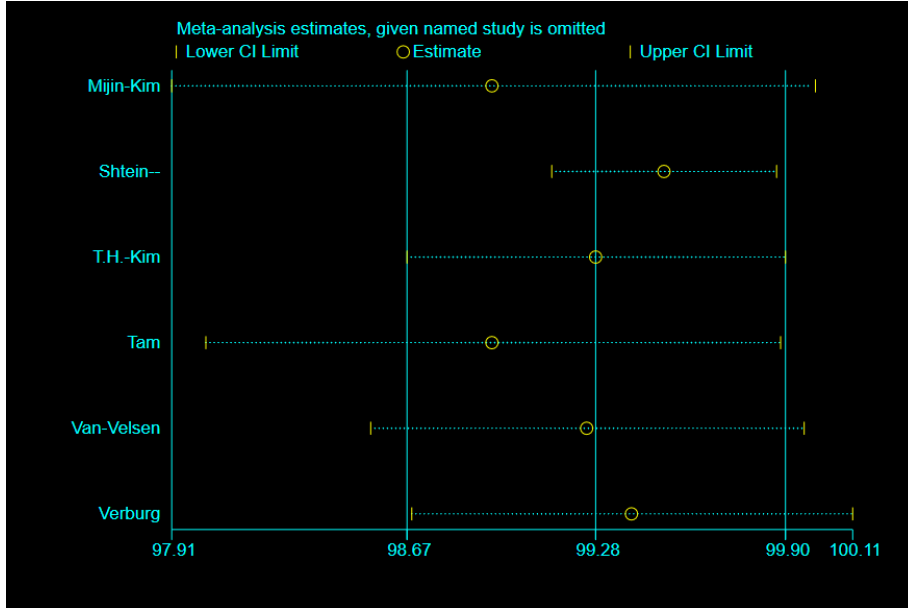

Sensitivity analysis for DSS, AJCC-8, Stage II.

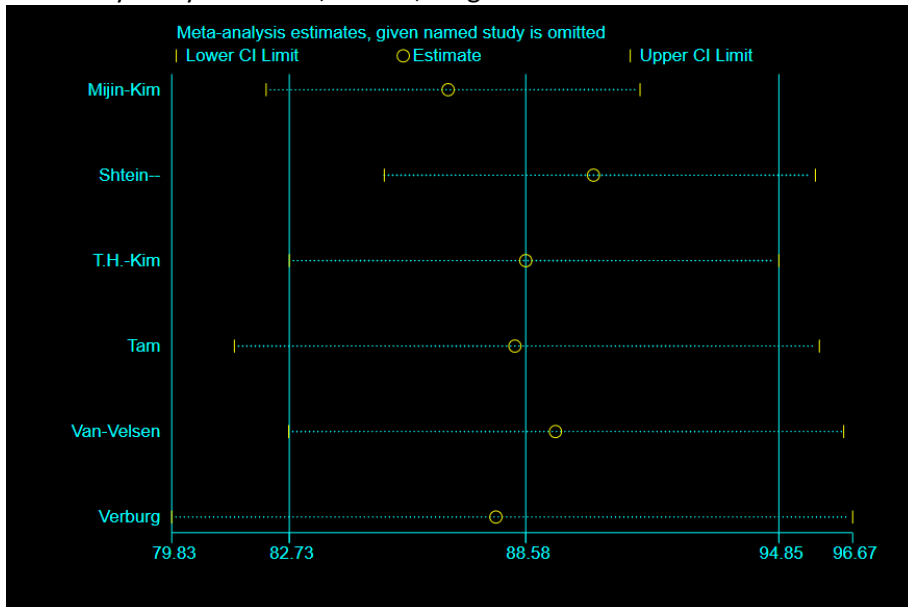

Supplemental Figures for:  
 Changes in Stage Distribution and Disease Specific Survival in Differentiated Thyroid Cancer with Transition to  
 AJCC 8th edition: A Meta-Analysis  
 Melissa Lechner et al.

Sensitivity analysis for DSS, AJCC-7, Stage III.

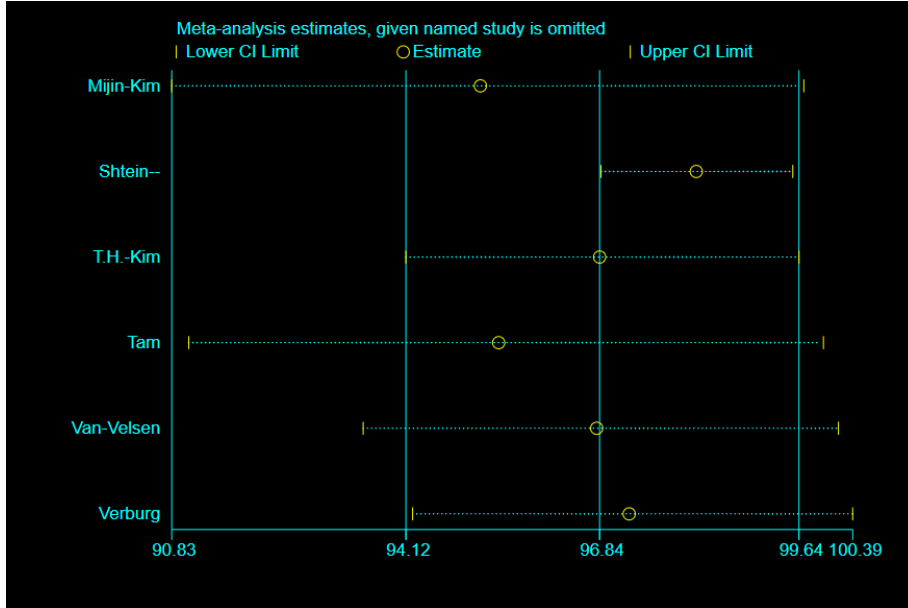

Sensitivity analysis for DSS, AJCC-7, Stage IV.

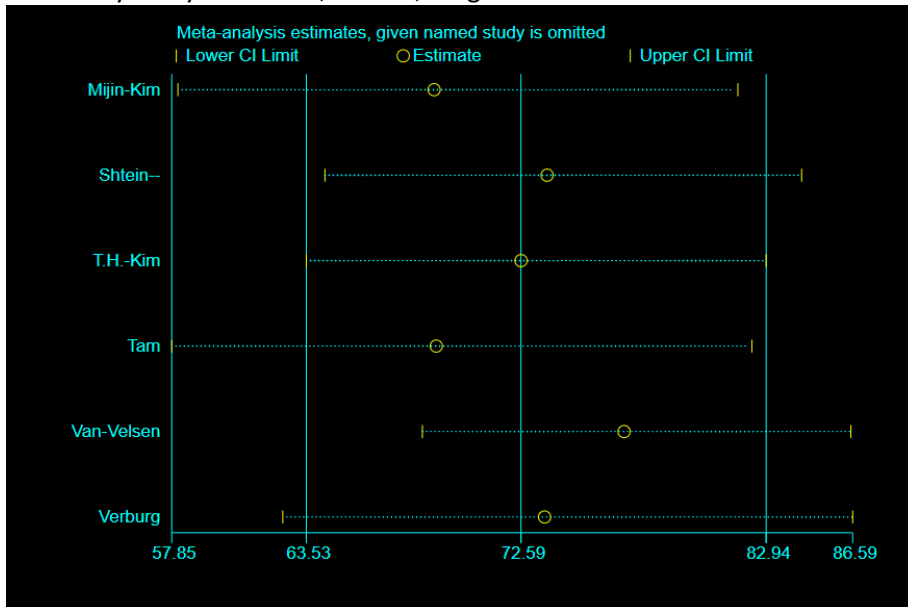

Supplemental Figures for:  
 Changes in Stage Distribution and Disease Specific Survival in Differentiated Thyroid Cancer with Transition to  
 AJCC 8th edition: A Meta-Analysis  
 Melissa Lechner et al.

Sensitivity analysis for DSS, AJCC-8, Stage III.

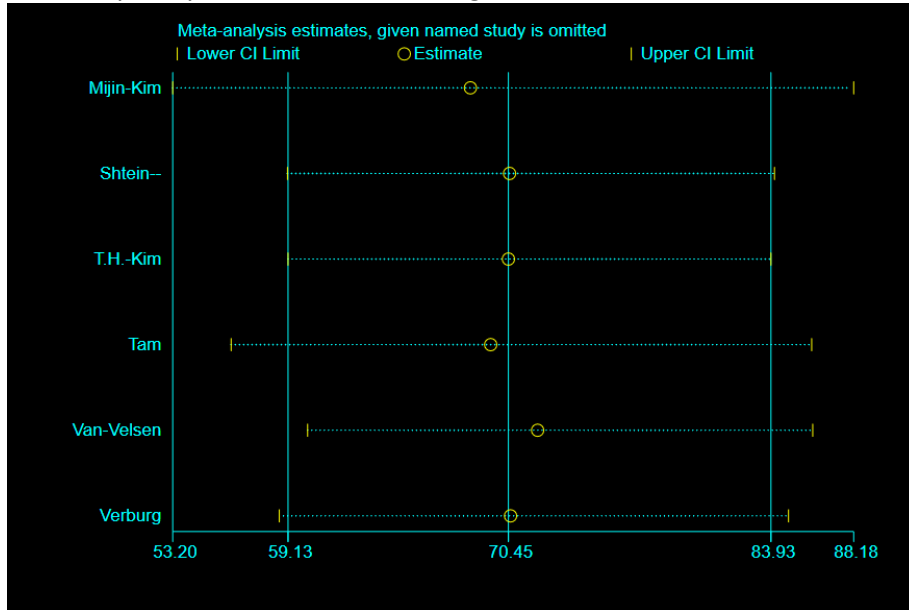

Sensitivity analysis for DSS, AJCC-8, Stage IV.

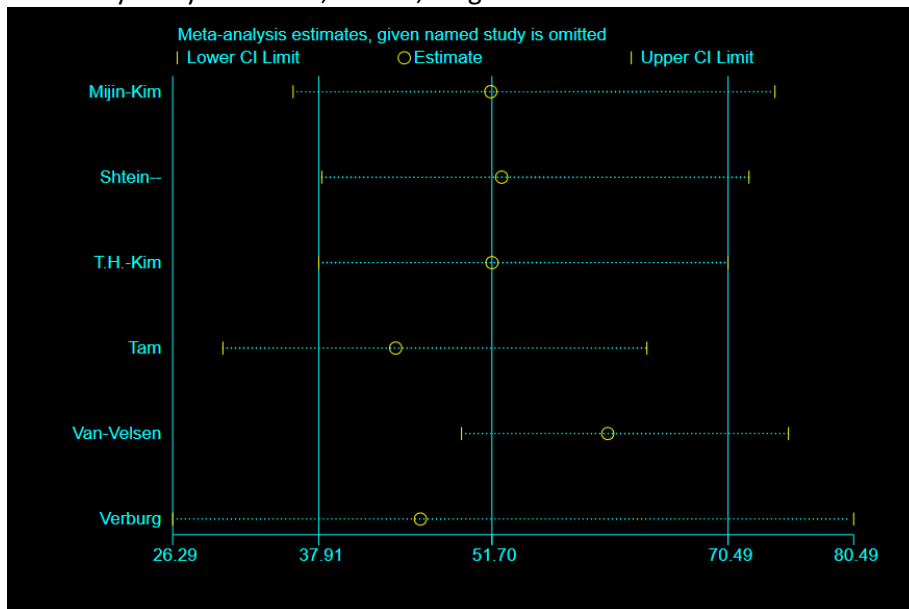

Supplemental Figures for:  
 Changes in Stage Distribution and Disease Specific Survival in Differentiated Thyroid Cancer with Transition to  
 AJCC 8th edition: A Meta-Analysis  
 Melissa Lechner et al.

Sensitivity analysis for stage migration from Stage II to I.

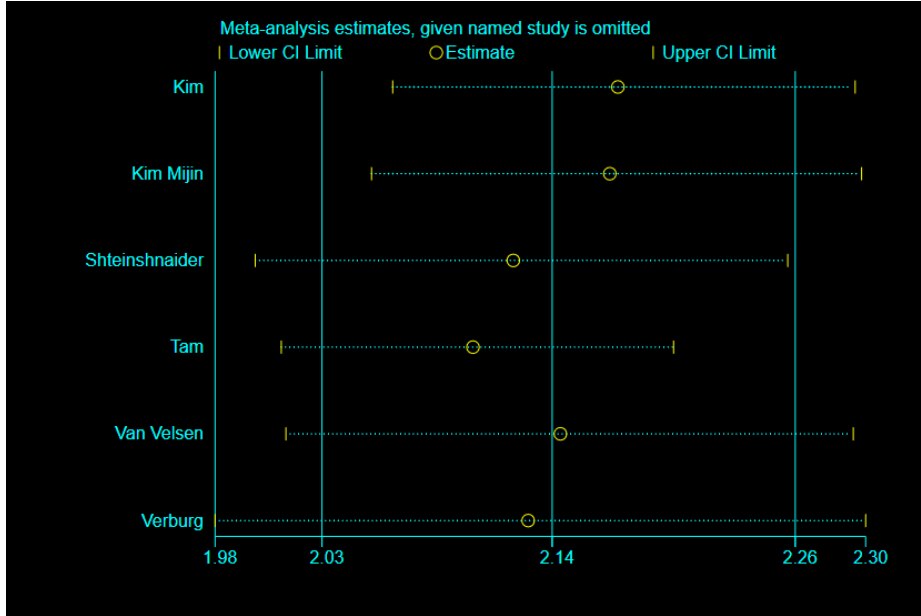

Sensitivity analysis for stage migration, remained in Stage II.

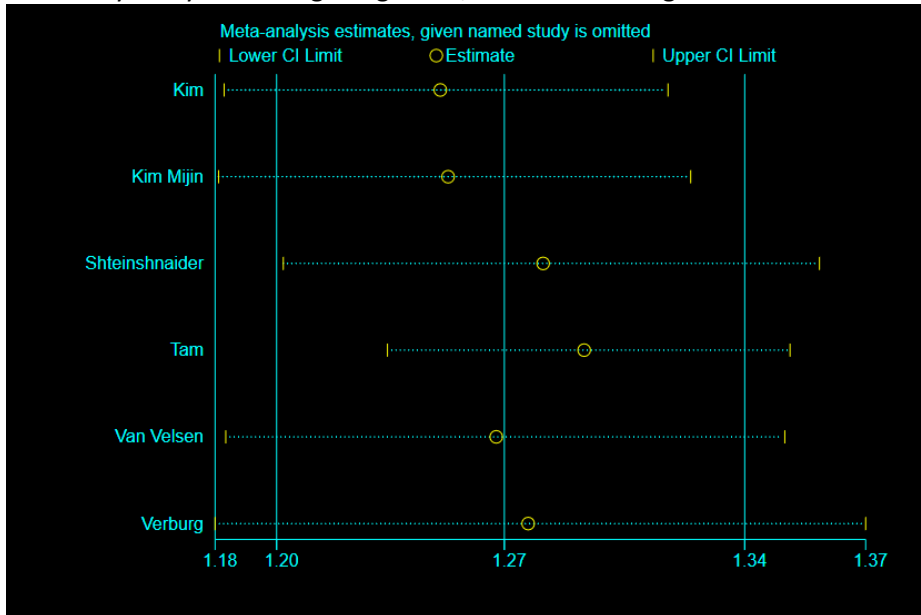

Supplemental Figures for:  
 Changes in Stage Distribution and Disease Specific Survival in Differentiated Thyroid Cancer with Transition to  
 AJCC 8th edition: A Meta-Analysis  
 Melissa Lechner et al.

Sensitivity analysis for stage migration from Stage III to I.

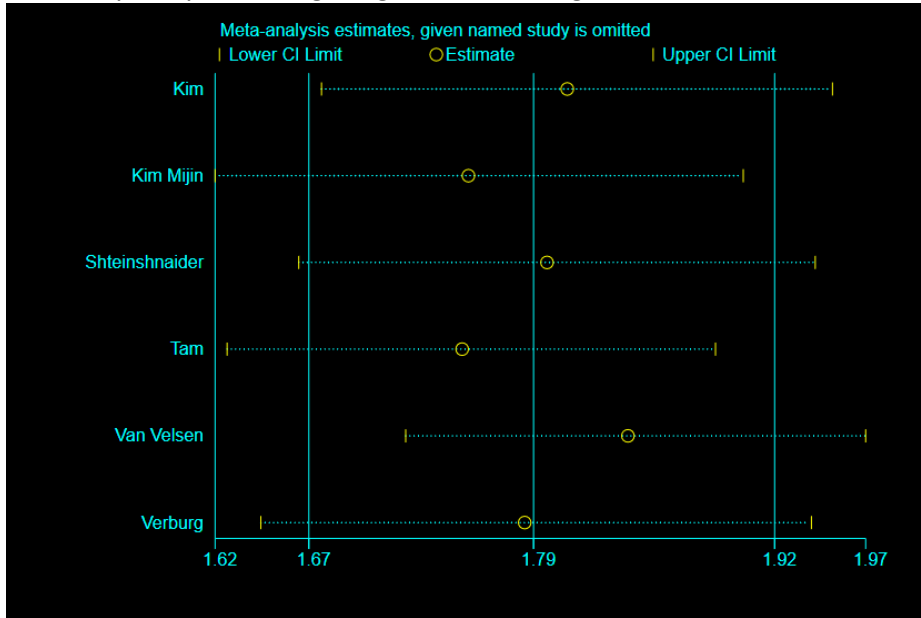

Sensitivity analysis for stage migration from Stage III to II.

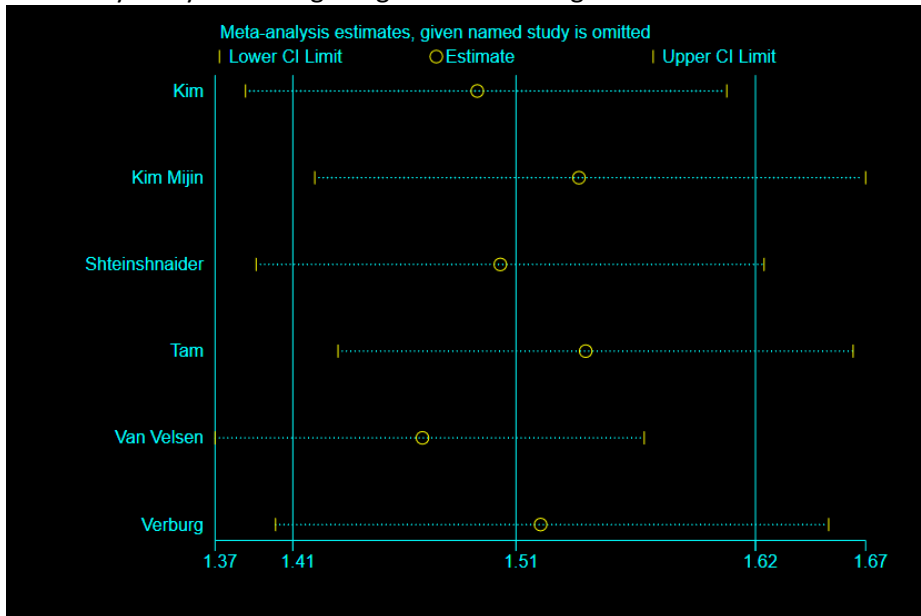



Supplemental Figures for:  
Changes in Stage Distribution and Disease Specific Survival in Differentiated Thyroid Cancer with Transition to  
AJCC 8th edition: A Meta-Analysis  
Melissa Lechner et al.

Supplemental Figures for:  
 Changes in Stage Distribution and Disease Specific Survival in Differentiated Thyroid Cancer with Transition to  
 AJCC 8th edition: A Meta-Analysis  
 Melissa Lechner et al.

Sensitivity analysis for stage migration from Stage IV to I.

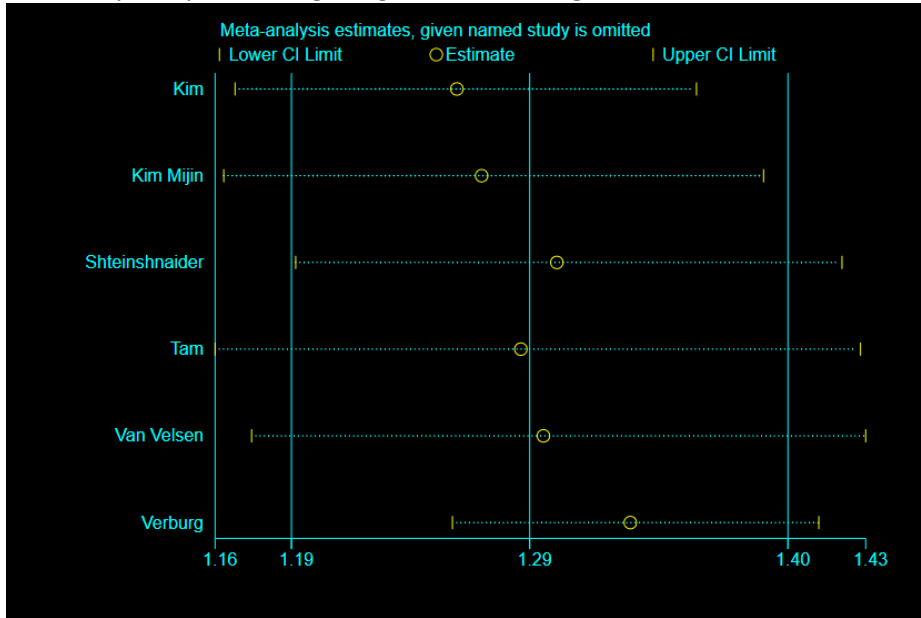

Sensitivity analysis for stage migration from Stage IV to II.

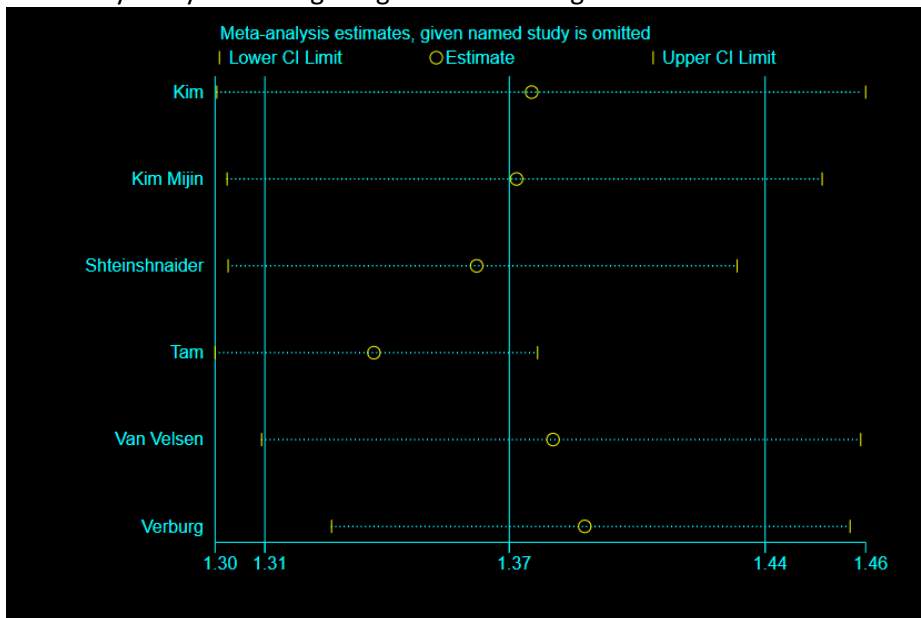

Supplemental Figures for:  
 Changes in Stage Distribution and Disease Specific Survival in Differentiated Thyroid Cancer with Transition to  
 AJCC 8th edition: A Meta-Analysis  
 Melissa Lechner et al.

Sensitivity analysis for stage migration from Stage IV to III.

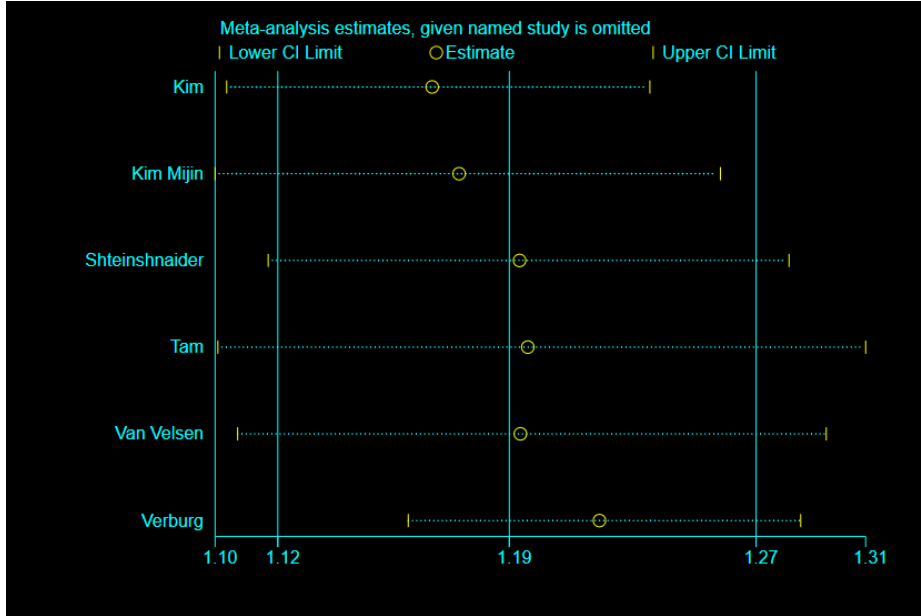

Stage Migration, remained in Stage IV.

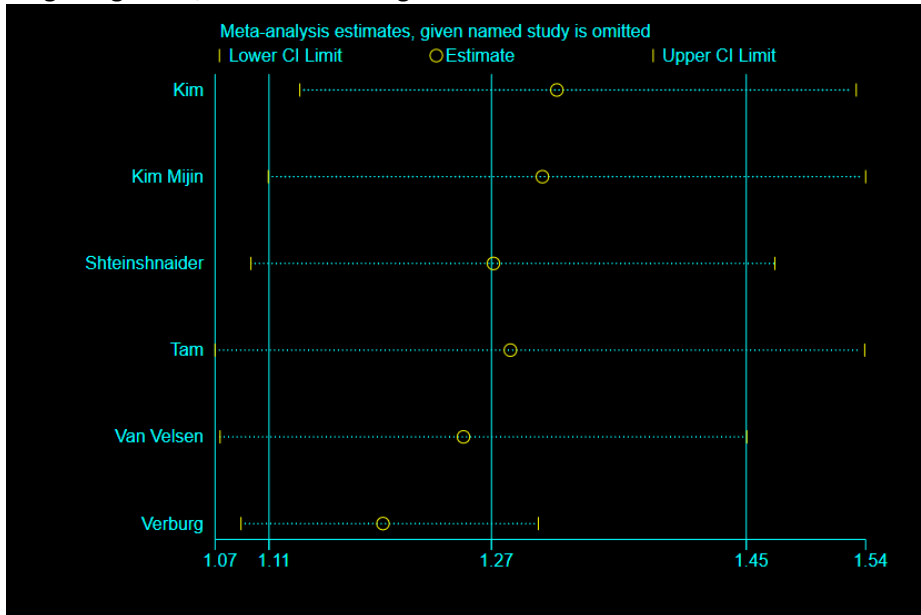

Supplement: ONCO-26-e251-s002.pdf [file ONCO-26-e251-s002.pdf]
