# Supplementary material
Source: PubMed Central journal article supplement (PMC7873343)
Supplement: ONCO-26-e251-s001.pdf [file ONCO-26-e251-s001.pdf]

Supplemental Appendix for:

Changes in Stage Distribution and Disease Specific Survival in Differentiated Thyroid Cancer with Transition to AJCC 8th edition: A Meta-Analysis

Melissa Lechner et al.

**Appendix S1.  
Supplemental Methods and Data**

**1. Survival analysis on Shteinshaidler and Verburg data**

Data on differentiated thyroid cancer patients was provided by Shteinshaidler *et al.* and Verburg *et al.* Patients were staged based on AJCC cancer staging 7<sup>th</sup> and 8<sup>th</sup> editions. Ten-year disease-specific survival (DSS) was calculated using Kaplan Meier analysis. Cox proportional hazards regression was utilized to compare survival by stage categories I, II, III, and IV. Significance tests two two-tailed with alpha=0.05. All analyses were performed using SAS software v. 9.4.

Shteinshaidler

One participant (ID=259) was excluded from the analysis due to incomplete data (missing start year).

Verburg

Participants with missing stage data (N=200) were excluded from the analysis.

Shteinshaidler

**Table 1.** Survival between seventh and eighth editions of the AJCC TNM staging system\*

| AJCC Stage                    | 10-year DSS (95% CI) | HR (95% CI)         | P-value |
|-------------------------------|----------------------|---------------------|---------|
| <b>7<sup>th</sup> Edition</b> |                      |                     |         |
| I                             | 95.71 (91.32, 97.91) | (ref)               | (ref)   |
| II                            | 93.18 (75.03, 98.28) | 1.90 (0.40, 8.94)   | 0.42    |
| III                           | 75.36 (59.99, 85.50) | 5.77 (2.36, 14.13)  | 0.0001  |
| IV                            | 54.92 (26.17, 76.50) | 12.17 (4.40, 33.67) | <0.0001 |
| <b>8<sup>th</sup> Edition</b> |                      |                     |         |
| I                             | 94.23 (90.28, 96.61) | (ref)               | (ref)   |
| II                            | 69.40 (49.51, 82.71) | 5.25 (2.33, 11.83)  | <0.0001 |
| III                           | 66.67 (5.41, 94.52)  | 4.73 (0.62, 35.99)  | 0.13    |
| IV                            | 25.00 (1.23, 64.60)  | 20.51 (6.70, 62.84) | <0.0001 |

Abbreviation: CI, confidence interval; DSS, disease-specific survival

\*Cox proportional hazards regression

Verburg

**Table 2.** Survival between seventh and eighth editions of the AJCC TNM staging system\*

| AJCC Stage                    | 10-year DSS (95% CI) | HR (95% CI)          | P-value |
|-------------------------------|----------------------|----------------------|---------|
| <b>7<sup>th</sup> Edition</b> |                      |                      |         |
| I                             | 99.19 (98.20, 99.64) | (ref)                | (ref)   |
| II                            | 98.24 (95.34, 99.34) | 2.25 (0.68, 7.48)    | 0.18    |
| III                           | 94.81 (88.57, 97.69) | 5.54 (2.08, 14.77)   | 0.0006  |
| IV                            | 68.75 (60.85, 75.39) | 45.61 (21.73, 95.73) | <0.0001 |
| <b>8<sup>th</sup> Edition</b> |                      |                      |         |

Supplemental Appendix for:  
 Changes in Stage Distribution and Disease Specific Survival in Differentiated Thyroid Cancer with Transition to  
 AJCC 8th edition: A Meta-Analysis  
 Melissa Lechner et al.

|     |                      |                       |         |
|-----|----------------------|-----------------------|---------|
| I   | 98.90 (98.05, 99.38) | (ref)                 | (ref)   |
| II  | 88.20 (81.66, 92.51) | 12.36 (5.96, 25.67)   | <0.0001 |
| III | 69.44 (29.14, 89.78) | 25.35 (7.15, 89.84)   | <0.0001 |
| IV  | 55.35 (43.01, 66.05) | 62.33 (32.50, 119.56) | <0.0001 |

Abbreviation: CI, confidence interval; DSS, disease-specific survival

\*Cox proportional hazards regression

## 2. Creating combined stage 4 HR estimate for Tae Huyk Kim study

One study only provided estimates for finer strata (a and b) for survival in stage 4 group. The 8<sup>th</sup> edition stage 4 cumulative HR was estimated using a fixed-effects model. The risk of mortality in thyroid patients in stage 4 is about 40 times higher (HR 43.6, 95% CI 18.4, 103.2) than those in stage 1.
